# Supplementary material for: Isolation and Time Lapse Microscopy of Highly Pure Hepatic Stellate Cells
Source: Anal Cell Pathol (Amst). 2015 Jul 16;2015:417023. doi: 10.1155/2015/417023 (PMC4519541; doi:10.1155/2015/417023)
Supplement: Supplementary file 1 — Time lapse microscopical studies of murine hepatic stellate cell maturation, their reactions towards the exposure to lipopolysaccharides, and their migrational behavior. [file 417023.f1.zip]

Archive with 6 entries (6 files):
- Video 1.mpg
- Video 2.mpg
- Video 3.mpg
- Video 4.mpg
- Video 5.mpg
- Video 6.mpg
